# Supplementary material for: Embodiment in episodic memory through premotor-hippocampal coupling
Source: PubMed Central journal article supplement — Commun Biol. 2024 Sep 10;7:1111. doi: 10.1038/s42003-024-06757-7 (PMC11387647; doi:10.1038/s42003-024-06757-7), 2024-09-10
Supplement: 42003_2024_6757_MOESM2_ESM.pdf [file 42003_2024_6757_MOESM2_ESM.pdf]

36 **Fig. S1. BSC ratings during encoding of scenes under different visuomotor conditions.**

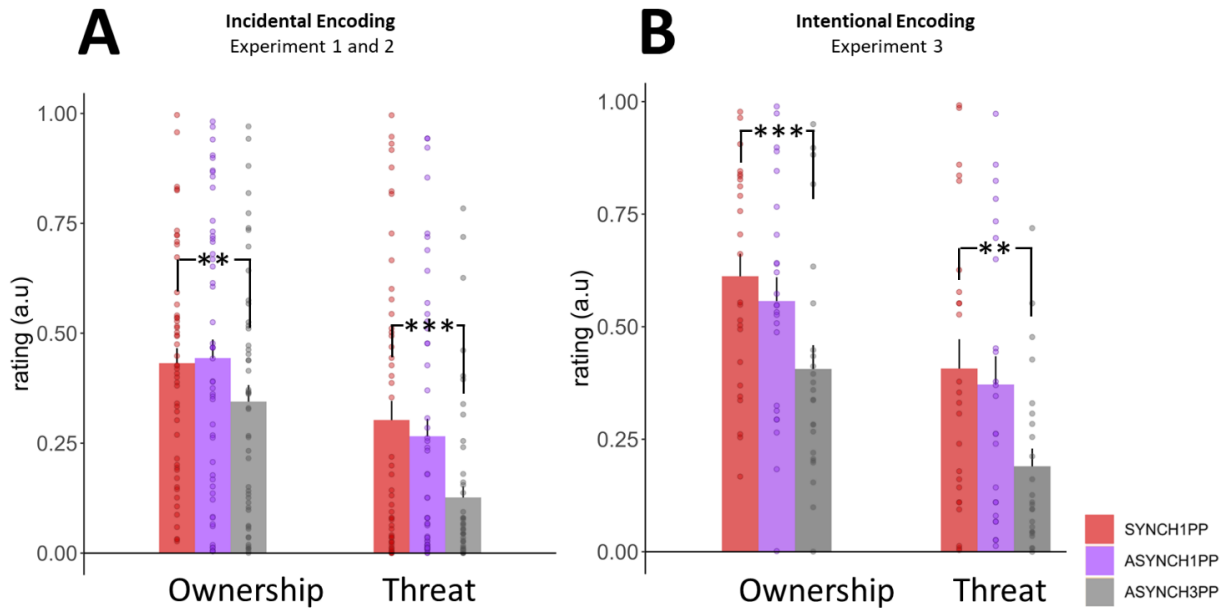

37  
38  
39  
40  
41  
42  
43  
44  
45  
46  
47  
48  
49  
50  
51

(A) Participants had a higher body ownership rating and were more afraid of the under visuomotor and perspectival congruency (SYNCH1PP, red) compared to visuomotor and perspectival mismatch (ASYNCH3PP, grey), no difference was observed between visuomotor and perspectival congruency (SYNCH1PP) and visuomotor mismatch (ASYNCH1PP, purple). \*\*,\*\*\* indicates significance level with p-value <0.01, < 0.001 respectively, as tested with a linear mixed model ; N = 50. (B) Participants had a higher body ownership and were more afraid of the threat under visuomotor and perspectival congruency (SYNCH1PP, red) compared to visuomotor and perspectival mismatch (ASYNCH3PP, grey), no difference was observed between visuomotor and perspectival congruency (SYNCH1PP) and visuomotor mismatch (ASYNCH1PP, purple). \*\*, \*\*\* indicates significance level with p-value <0.01 , < 0.001 respectively as tested with a linear mixed model N = 25.

52

53 **Fig. S2. Effect of objects changes laterality on recognition.**

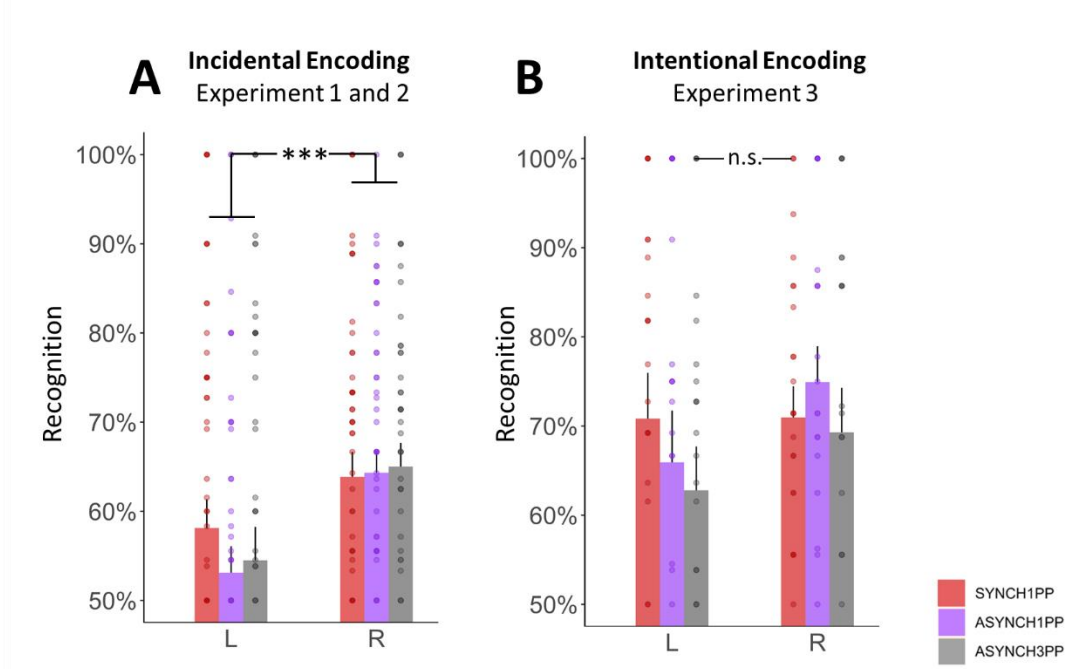

54

55 (A) There was a significant main effect of object side but no interaction between conditions and  
56 object side under the incidental encoding instruction (experiment 1 & 2) as tested with linear mixed  
57 model, N = 48. \*\*\* indicates significance level with p-value <0.001. (B) There was no effect of  
58 object laterality under intentional encoding instruction (experiment 3). linear mixed model, N =  
59 24.  
60

61 **Fig. S3. Patient's lesion on the day of hospitalisation.**

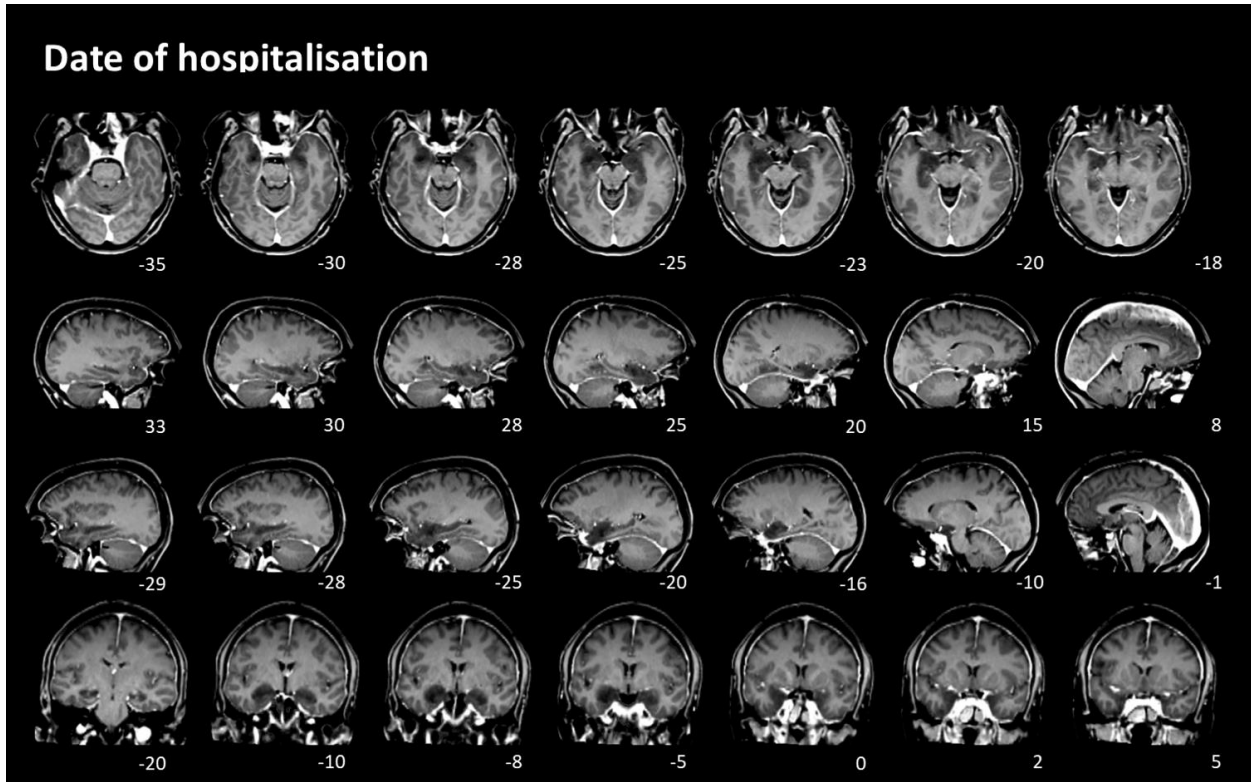

62  
63 Anatomical scan of the patient on the day of the hospitalisation acquired with a Siemens MR-  
64 scanner (3T). dark regions around the left hippocampus show sign of inflammation.  
65

66  
67

68 **Fig. S4. Patient's lesion eight month after hospitalisation.**

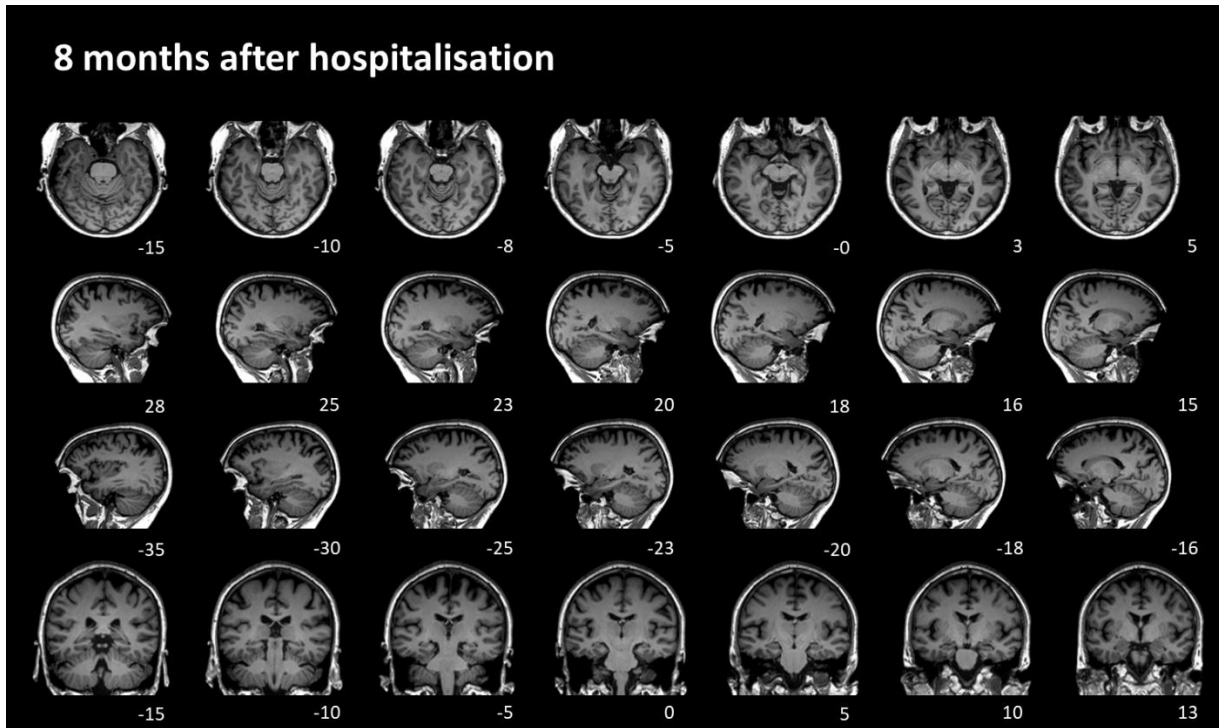

69  
70 Anatomical scan of the patient taken eight months after the diagnosis. Clear amelioration of the  
71 inflammation around the hippocampal regions based on clinical report, although the patient did  
72 not recover from her amnesic deficit.  
73

|                             | Estimate | t-value | p-value    |
|-----------------------------|----------|---------|------------|
| (Intercept)                 | 0.654    | 12.383  | <0.001 *** |
| factor(Conditions)ASYNCH1PP | -0.067   | -2.931  | 0.003**    |
| factor(Conditions)ASYNCH3PP | -0.065   | -2.841  | 0.005**    |
| factor(Experiment)MRI       | -0.045   | -0.652  | 0.515      |

74 **Table S1.1**

75 **Effect of conditions on sense of agency ratings in Experiment 1 and 2:** Agency ~ Conditions  
 76 + Experiment + random(Participants).

77

|                             | Estimate | t-value | p-value    |
|-----------------------------|----------|---------|------------|
| (Intercept)                 | 0.464    | 8.285   | <0.001 *** |
| factor(Conditions)ASYNCH1PP | 0.012    | 0.387   | 0.699      |
| factor(Conditions)ASYNCH3PP | -0.087   | -2.903  | 0.004 **   |
| factor(Experiment)MRI       | -0.833   | -0.833  | 0.405      |

78 **Table S1.2.**

79 **Effect of conditions on ownership ratings in Experiment 1 and 2:** Ownership ~ Conditions +  
 80 Experiment + random(Participants).

|                             | Estimate | t-value | p-value    |
|-----------------------------|----------|---------|------------|
| (Intercept)                 | 0.289    | 5.557   | <0.001 *** |
| factor(Conditions)ASYNCH1PP | -0.037   | -0.936  | 0.349      |
| factor(Conditions)ASYNCH3PP | -0.176   | -4.451  | <0.001 *** |
| factor(Experiment)MRI       | 0.024    | 0.384   | 0.701      |

81 **Table S1.3.**

82 **Effect of conditions on threat ratings in Experiment 1 and 2:** Threat ~ Conditions +  
 83 Experiment + random(Participants).

84

85

|                             | Estimate | t-value | p-value  |
|-----------------------------|----------|---------|----------|
| (Intercept)                 | 0.068    | 2.678   | 0.007 ** |
| factor(Conditions)ASYNCH1PP | 0.012    | 0.942   | 0.346    |
| factor(Conditions)ASYNCH3PP | -0.013   | -1.043  | 0.297    |
| factor(Experiment)MRI       | 0.061    | 1.829   | 0.067    |

86 **Table S1.4.**

87 **Effect of conditions on control ratings for experimental bias in Experiment 1 and 2:** Control

88 ~ Conditions + Experiment + random(Participants).

89

|                             | Estimate | z-value | p-value    |
|-----------------------------|----------|---------|------------|
| (Intercept)                 | 0.643    | 6.925   | <0.001 *** |
| factor(Conditions)ASYNCH1PP | 0.025    | 0.355   | 0.723      |
| factor(Conditions)ASYNCH3PP | 0.064    | 0.929   | 0.353      |
| factor(Environment)ENV2     | 0.207    | 2.969   | 0.003 **   |
| factor(Environment)ENV3     | -0.002   | -0.031  | 0.975      |
| factor(Experiment)MRI       | -0.025   | -0.243  | 0.808      |

90 **Table S2**  
91 **Effect of conditions on performance (Experiment 1-2):** Performance ~ Conditions + Scene +  
92 Experiment + random(Participants).  
93



|                             | Estimate | t-value | p-value    |
|-----------------------------|----------|---------|------------|
| (Intercept)                 | 0.695    | 13.684  | <0.001 *** |
| factor(Conditions)ASYNCH1PP | -0.042   | -1.202  | 0.229      |
| factor(Conditions)ASYNCH3PP | -0.111   | -3.159  | 0.002 **   |

94 **Table S3.1**

95 **Effect of conditions on sense of agency ratings in Experiment 3:** Agency ~ Conditions +  
 96 random(Participants).

|                             | Estimate | t-value | p-value    |
|-----------------------------|----------|---------|------------|
| (Intercept)                 | 0.612    | 11.760  | <0.001 *** |
| factor(Conditions)ASYNCH1PP | -0.055   | -1.226  | 0.220      |
| factor(Conditions)ASYNCH3PP | -0.206   | -4.590  | <0.001 *** |

97 **Table S3.2.**

98 **Effect of conditions on ownership ratings in Experiment 3:** Ownership ~ Conditions +  
 99 random(Participants).

|                             | Estimate | t-value | p-value    |
|-----------------------------|----------|---------|------------|
| (Intercept)                 | 0.407    | 7.136   | <0.001 *** |
| factor(Conditions)ASYNCH1PP | -0.035   | -0.508  | 0.612      |
| factor(Conditions)ASYNCH3PP | -0.217   | -3.126  | 0.002 **   |

100 **Table S3.3.**

101 **Effect of conditions on threat ratings in Experiment 3:** Threat ~ Conditions +  
 102 random(Participants).

|                             | Estimate | t-value | p-value    |
|-----------------------------|----------|---------|------------|
| (Intercept)                 | 0.179    | 5.600   | <0.001 *** |
| factor(Conditions)ASYNCH1PP | -0.010   | -0.557  | 0.578      |
| factor(Conditions)ASYNCH3PP | -0.028   | -1.503  | 0.133      |

103 **Table S3.4.**

104 **Effect of conditions on control ratings for experimental bias in Experiment 3:** Control ~  
 105 Conditions + random(Participants).

106

|                             | Estimate | z-value | p-value    |
|-----------------------------|----------|---------|------------|
| (Intercept)                 | 1.211    | 8.607   | <0.001 *** |
| factor(Conditions)ASYNCH1PP | -0.328   | -3.058  | 0.002 **   |
| factor(Conditions)ASYNCH3PP | -0.316   | -2.949  | 0.003 **   |
| factor(Environment)ENV2     | 0.013    | 0.119   | 0.905      |
| factor(Environment)ENV3     | 0.100    | 0.943   | 0.346      |

107 **Table S4.**  
108 **Effect of conditions on performance (Experiment 3):** Performance ~ Conditions + Scene +  
109 random(Participants).

110

|                                                      | Estimate | z-value | p-value    |
|------------------------------------------------------|----------|---------|------------|
| (Intercept)                                          | 0.212    | 1.348   | 0.178      |
| factor(Conditions)ASYNCH1PP                          | -0.201   | -1.421  | 0.155      |
| factor(Conditions)ASYNCH3PP                          | -0.177   | -1.238  | 0.216      |
| Factor(Laterality) R                                 | 0.288    | 2.028   | 0.043 *    |
| factor(Environment)ENV2                              | 0.645    | 6.440   | <0.001 *** |
| factor(Environment)ENV3                              | 0.091    | 0.917   | 0.359      |
| factor(XP)MRI                                        | -0.277   | -1.946  | 0.052      |
| factor(Conditions)ASYNCH1PP ×<br>factor(Laterality)R | 0.145    | 0.737   | 0.461      |
| factor(Conditions)ASYNCH3PP ×<br>factor(Laterality)R | 0.162    | 0.820   | 0.412      |

111 **Table S5.**  
112 **Effect of object laterality on performance (Experiment 1-2):** Performance ~  
113 Conditions\*ObjectLaterality(L/R) + Scene + random(Participants).  
114

115

|                                                      | Estimate | z-value | p-value  |
|------------------------------------------------------|----------|---------|----------|
| (Intercept)                                          | 0.671    | 3.087   | 0.002 ** |
| factor(Conditions)ASYNCH1PP                          | -0.399   | -1.87   | 0.062    |
| factor(Conditions)ASYNCH3PP                          | -0.398   | -1.864  | 0.062    |
| Factor(Laterality) R                                 | 0.037    | 0.168   | 0.867    |
| factor(Environment)ENV2                              | 0.5      | 2.83    | 0.001 ** |
| factor(Environment)ENV3                              | 0.255    | 1.662   | 0.095    |
| factor(Conditions)ASYNCH1PP ×<br>factor(Laterality)R | 0.502    | 0.737   | 0.097    |
| factor(Conditions)ASYNCH3PP ×<br>factor(Laterality)R | 0.194    | 0.650   | 0.515    |

116 **Table S6.**  
 117 **Effect of object laterality on performance (Experiment 3):** Performance ~  
 118 Conditions\*ObjectLaterality(L/R) + Scene + random(Participants).

119

|                             | Estimate | t-value | p-value  |
|-----------------------------|----------|---------|----------|
| (Intercept)                 | 0.039    | 1.700   | 0.089    |
| factor(Conditions)ASYNCH1PP | -0.045   | -2.570  | 0.010    |
| factor(Conditions)ASYNCH3PP | -0.045   | -2.596  | 0.009 ** |
| factor(Environment)ENV2     | -0.012   | -0.668  | 0.504    |
| factor(Environment)ENV3     | -0.006   | -0.323  | 0.747    |

120 **Table S7.**  
121 **Effect of conditions on hippocampal ERS:** Hippocampal ERS Success ~ Conditions + Scene +  
122 random(Participants).

123

|                             | Estimate | t-value | p-value  |
|-----------------------------|----------|---------|----------|
| (Intercept)                 | 0.008    | 0.327   | 0.743    |
| factor(Conditions)ASYNCH1PP | -0.048   | -2.769  | 0.006 ** |
| factor(Conditions)ASYNCH3PP | -0.011   | -0.637  | 0.524    |
| factor(Environment)ENV2     | 0.033    | 1.910   | 0.056    |
| factor(Environment)ENV3     | 0.001    | 0.083   | 0.934    |

124 **Table S8.**  
125 **Effect of conditions on middle temporal gyrus ERS:** middle temporal gyrus ERS Success ~  
126 Conditions + Scene + random(Participants).  
127

|                             | Estimate | t-value | p-value |
|-----------------------------|----------|---------|---------|
| (Intercept)                 | 0.039    | 2.254   | 0.024 * |
| factor(Conditions)ASYNCH1PP | -0.010   | -0.478  | 0.633   |
| factor(Conditions)ASYNCH3PP | -0.033   | -1.628  | 0.103   |
| factor(Environment)ENV2     | -0.009   | -0.462  | 0.644   |
| factor(Environment)ENV3     | -0.002   | -0.120  | 0.904   |

128 **Table S9.**  
129 **Effect of conditions on orbitofrontal ERS:** orbitofrontal ERS Success ~ Conditions + Scene +  
130 random(Participants).  
131  
132

|                             | Estimate | t-value | p-value |
|-----------------------------|----------|---------|---------|
| (Intercept)                 | 0.061    | 1.795   | 0.073   |
| factor(Conditions)ASYNCH1PP | -0.001   | -0.043  | 0.966   |
| factor(Conditions)ASYNCH3PP | -0.030   | -1.590  | 0.112   |
| factor(Environment)ENV2     | 0.003    | 0.155   | 0.877   |
| factor(Environment)ENV3     | -0.029   | -1.544  | 0.123   |

133 **Table S10.**  
134 **Effect of conditions on visual ERS:** visual ERS Success ~ Conditions + Scene + random  
135 (Participants).  
136



|                | <i>AIC</i> | <i>BIC</i> | <i>logLik</i> | <i>deviance</i> | <i>Chisq</i> | <i>Df</i> | <i>Pr(&gt;Chisq)</i> |
|----------------|------------|------------|---------------|-----------------|--------------|-----------|----------------------|
| <i>Model 0</i> | 159.731    | 146.071    | 85.86549      | 171.731         |              |           |                      |
| <i>Model 1</i> | 159.834    | 137.068    | 89.91708      | 179.834         | 8.103189     | 4         | 0.087871             |

137 **Table S11.**

138 **Model comparison : performance explained by ERS Hippocampus with or without**  
139 **conditions.** (Model 0) Performance ~ ERS Hippocampus + Scene + random(Participants).  
140 **(Model1)** Performance ~ ERS Hippocampus \* Conditions + Scene + random(Participants)

141

142

|                         | Estimate | t-value | p-value   |
|-------------------------|----------|---------|-----------|
| (Intercept)             | 0.661    | 40.842  | <0.001*** |
| ERS                     | 0.291    | 2.723   | 0.006 **  |
| factor(Environment)ENV2 | 0.052    | 2.748   | 0.006 **  |
| factor(Environment)ENV3 | -0.008   | -0.409  | 0.682     |

143 **Table S12.**

144 **Effect of hippocampal ERS on performance:**  $Performance \sim Hippocampal\ ERS + Scene +$   
145  $random(Participants).$

146

|                | <i>AIC</i> | <i>BIC</i> | <i>logLik</i> | <i>deviance</i> | <i>Chisq</i> | <i>Df</i> | <i>Pr(&gt;Chisq)</i> |
|----------------|------------|------------|---------------|-----------------|--------------|-----------|----------------------|
| <i>Model 0</i> | 3580.075   | 3627.8     | 1782.04       | 3564.075        |              |           |                      |
| <i>Model 1</i> | 3416.513   | 3500.031   | 1694.26       | 3388.513        | 175.5622     | 6         | <0.001               |

147 **Table S13.1**

148 **Model comparison: performance (trial-by-trial) explained by hippocampal ERS and**  
149 **conditions or hippocampal ERS, conditions, and stimulus type.** (Model 0) Performance  
150 (binomial) ~hippocampal ERS \* Conditions + Trials +random(Participants).(Model 1)  
151 Performance (binomial) ~hippocampal ERS \* Conditions \*Stimulus+ Trials  
152 +random(Participants)

153

154

|                                                              | Estimate | z-value | p-value   |
|--------------------------------------------------------------|----------|---------|-----------|
| (Intercept)                                                  | -0.368   | -2.910  | <0.001*** |
| factor(Conditions)ASYNCH1PP                                  | 0.088    | 0.661   | 0.509     |
| factor(Conditions)ASYNCH3PP                                  | 0.104    | 0.780   | 0.435     |
| ERS                                                          | -0.411   | -1.168  | 0.243     |
| Factor(Stimulus)NoChange                                     | 1.009    | 6.874   | <0.001*** |
| Trials                                                       | 0.028    | 7.684   | 0.001 **  |
| factor(Conditions)ASYNCH1PP × ERS                            | 0.650    | 1.293   | 0.196     |
| factor(Conditions)ASYNCH3PP × ERS                            | 0.684    | 1.342   | 0.180     |
| factor(Conditions)ASYNCH1PP × Stimulus(NoChange)             | 0.168    | 0.791   | 0.429     |
| factor(Conditions)ASYNCH3PP × Stimulus(NoChange)             | 0.056    | 3.524   | 0.787     |
| ERS x factor(Stimulus) NoChange                              | 1.862    | 3.524   | <0.001*** |
| factor(Conditions)ASYNCH1PP × ERSx factor(Stimulus) NoChange | -1.073   | -1.380  | 0.168     |
| factor(Conditions)ASYNCH3PP × ERSx factor(Stimulus) NoChange | -2.043   | -2.604  | 0.009 **  |

155 **Table S13.2**  
156 **Effect of hippocampal ERS , conditions and type of stimuli (Original scene or changed**  
157 **scene) on performance:** Performance ~ Hippocampal ERS Conditions\*Stim +Trials +  
158 random(Participants)

159  
160  
161  
162  
163  
164  
165  
166  
167  
168  
169  
170

171  
172  
173

|                                   | Estimate | z-value | p-value  |
|-----------------------------------|----------|---------|----------|
| (Intercept)                       | -0.105   | -0.686  | 0.493    |
| factor(Conditions)ASYNCH1PP       | 0.089    | 0.670   | 0.503    |
| factor(Conditions)ASYNCH3PP       | 0.112    | 0.835   | 0.403    |
| ERS                               | -0.509   | -1.429  | 0.153    |
| Trials                            | 0.028    | 7.684   | 0.001 ** |
| factor(Conditions)ASYNCH1PP × ERS | 0.725    | 1.435   | 0.151    |
| factor(Conditions)ASYNCH3PP × ERS | 0.777    | 1.516   | 0.130    |

174 **Table S13.3**  
175 **Effect of hippocampal ERS and conditions on performance for recognition of changed**  
176 **scene (Change):** Performance (Change) ~ Hippocampal ERS \*Conditions +Trials +  
177 random(Participants).

|                                   | Estimate | z-value | p-value   |
|-----------------------------------|----------|---------|-----------|
| (Intercept)                       | 0.324    | 1.487   | 0.137     |
| factor(Conditions)ASYNCH1PP       | 0.276    | 1.587   | 0.112     |
| factor(Conditions)ASYNCH3PP       | 0.180    | 1.065   | 0.287     |
| ERS                               | 1.545    | 3.527   | <0.001*** |
| Trials                            | 0.052    | 8.290   | <0.001*** |
| factor(Conditions)ASYNCH1PP × ERS | -0.593   | -0.916  | 0.360     |
| factor(Conditions)ASYNCH3PP × ERS | -1.665   | -2.551  | 0.011 *   |

178 **Table S13.4.**  
179 **Effect of hippocampal ERS and conditions on performance for recognition of original scene**  
180 **(No change):** Performance (NoChange) ~ Hippocampal ERS \*Conditions +Trials +  
181 random(Participants).

182

|             | Estimate | z-value | p-value   |
|-------------|----------|---------|-----------|
| (Intercept) | -0.013   | -0.042  | 0.966     |
| ERS         | 1.720    | 3.520   | <0.001*** |
| Trials      | 0.075    | 6.260   | <0.001*** |

183 **Table S13.5.**  
184 **Effect of hippocampal ERS on performance for recognition of original scene (No change) in**  
185 **SYNCH1PP: Performance (No Change) ~ Hippocampal ERS SYNCH1PP +Trials +**  
186 **random(Participants).**

187

|             | Estimate | z-value | p-value   |
|-------------|----------|---------|-----------|
| (Intercept) | 0.742    | 2.512   | 0.012 *   |
| ERS         | -0.223   | -0.429  | 0.668     |
| Trials      | 0.043    | 4.036   | <0.001*** |

188 **Table S13.6.**  
189 **Effect of hippocampal ERS on performance for recognition of original scene (No change) in**  
190 **ASYNCH3PP: Performance (No Change) ~ Hippocampal ERS ASYNCH3PP +Trials +**  
191 **random(Participants).**

192

|                         | Estimate | t-value | p-value   |
|-------------------------|----------|---------|-----------|
| (Intercept)             | 0.66     | 30.77   | <0.001*** |
| ERS                     | 0.08     | 0.6     | 0.55      |
| factor(Environment)ENV2 | 0.04     | 1.8     | 0.08      |
| factor(Environment)ENV3 | -0.02    | -0.61   | 0.54      |

193 **Table S14.**  
194 **Effect of middle temporal gyrus ERS on performance:** Performance ~ Middle temporal gyrus  
195 ERS + Scene + random(Participants).  
196

|         | [x y z]   | k   | p-value FEW corrected |
|---------|-----------|-----|-----------------------|
| Cluster | [6 -2 54] | 856 | 0.02                  |

197 **Table S15.**  
198 *Cluster sensitive to the BSC manipulation at encoding: SYNCH1PP-*  
199 *(ASYNCH1PP+ASYNCH3PP) BSC session.*  
200



|                                   | Estimate | t-value | p-value   |
|-----------------------------------|----------|---------|-----------|
| (Intercept)                       | 0.019    | 0.877   | 0.380     |
| factor(Conditions)ASYNCH1PP       | -0.013   | -1.147  | 0.252     |
| factor(Conditions)ASYNCH3PP       | -0.008   | -0.714  | 0.475     |
| ERS                               | 0.199    | 7.404   | <0.001*** |
| Trials                            | -0.002   | -4.674  | <0.001*** |
| factor(Conditions)ASYNCH1PP × ERS | -0.192   | -5.264  | <0.001*** |
| factor(Conditions)ASYNCH3PP × ERS | -0.069   | -1.896  | 0.058     |

201 **Table S16.1**

202 **Left dPMC and hippocampal ERS coupling: Hippocampal ERS ~ Premotor ERS \* Conditions**  
 203 **+Trials + random(Participants).**

|             | Estimate | t-value | p-value   |
|-------------|----------|---------|-----------|
| (Intercept) | 0.035    | 1.269   | 0.205     |
| ERS         | 0.194    | 6.765   | <0.001*** |
| Trials      | -0.003   | -3.730  | <0.001*** |

204 **Table S16.2**

205 **Left dPMC and hippocampal ERS coupling for SYNCH1PP: Hippocampal ERS ~ Premotor**  
 206 **ERS +Trials + random(Participants).**

|             | Estimate | t-value | p-value |
|-------------|----------|---------|---------|
| (Intercept) | 0.001    | 0.045   | 0.964   |
| ERS         | -0.038   | -1.366  | 0.172   |
| Trials      | -0.002   | -2.254  | 0.024 * |

207 **Table S16.3**

208 **Left dPMC and hippocampal ERS coupling for ASYNCH1PP: Hippocampal ERS ~**  
 209 **Premotor ERS +Trials + random(Participants).**

210

|                                   | Estimate | t-value | p-value  |
|-----------------------------------|----------|---------|----------|
| (Intercept)                       | 0.012    | 0.564   | 0.573    |
| factor(Conditions)ASYNCH1PP       | -0.019   | -1.692  | 0.091    |
| factor(Conditions)ASYNCH3PP       | -0.012   | 2.454   | 0.262    |
| ERS                               | 0.061    | 7.404   | 0.014 *  |
| Trials                            | -0.001   | -2.961  | 0.003 ** |
| factor(Conditions)ASYNCH1PP × ERS | 0.007    | 0.216   | 0.829    |
| factor(Conditions)ASYNCH3PP × ERS | 0.006    | 0.171   | 0.864    |

211 **Table S17.**  
212 **Left SMA and hippocampal ERS coupling:** Hippocampal ERS ~ Left SMA ERS \*Conditions  
213 +Trials + random(Participants).  
214

|                                   | Estimate | t-value | p-value   |
|-----------------------------------|----------|---------|-----------|
| (Intercept)                       | 0.020    | 0.946   | 0.344     |
| factor(Conditions)ASYNCH1PP       | -0.019   | -1.674  | 0.094     |
| factor(Conditions)ASYNCH3PP       | -0.012   | -1.106  | 0.269     |
| ERS                               | 0.006    | 0.260   | 0.795     |
| Trials                            | -0.002   | -3.962  | <0.001*** |
| factor(Conditions)ASYNCH1PP × ERS | -0.002   | -0.059  | 0.953     |
| factor(Conditions)ASYNCH3PP × ERS | 0.046    | 1.366   | 0.172     |

215 **Table S18.**  
216 **Right SMA and hippocampal ERS coupling:** Hippocampal ERS ~ Right SMA ERS  
217 \*Conditions +Trials + random(Participants).  
218

| Test                                                                                            | Raw scores                                                                                                                                                                                                                                      | VIN              | IN | SIN | N           | SSN | SN | VSN |
|-------------------------------------------------------------------------------------------------|-------------------------------------------------------------------------------------------------------------------------------------------------------------------------------------------------------------------------------------------------|------------------|----|-----|-------------|-----|----|-----|
| <b>Orientation</b>                                                                              |                                                                                                                                                                                                                                                 |                  |    |     |             |     |    |     |
| Orientation Questionnaire (Von Cramon & Säring, 1982)                                           | Oriented in 4 modes : 18/29<br>Temporal orientation : 5/5, spatiale : 5/5, personal : 4/5, situation : 4/5                                                                                                                                      |                  |    |     | X           |     |    |     |
| <b>Mnesic function</b>                                                                          |                                                                                                                                                                                                                                                 |                  |    |     |             |     |    |     |
| Short-term memory Empan verbal WAIS-IV (Welcher, 2011)<br>Empan visuospatial Corsi (CHUV, 1985) | 4<br>5                                                                                                                                                                                                                                          |                  |    | X   | X           |     |    |     |
| Rivermead Behavioural Memory Test (Wilson et al., 2008)                                         | Name: 4<br>Personal objects : 8<br>Delayed images: 13<br>Delayed history: 5<br>Orientation and date : 9                                                                                                                                         | X                |    | X   | X<br>X<br>X |     |    |     |
| RL-RI 16 (Van der Linden et al., 2004)                                                          | Immediate recall: 16<br>RL delayed: 6/16<br>RL delayed (7 days): 0/9                                                                                                                                                                            | X                | X  |     | X           |     |    |     |
| TEMPau (Piolino et al., 2008)                                                                   | 0-17 y.o. global score: 3, episodic score 1<br>18-30 y.o. global score: 6, episodic score 2<br>>30 y.o. global score: 6, episodic score 2<br>Last 5 years global score: 5, episodic score 2<br>Last 12 months global score: 2, episodic score 1 | X<br>X<br>X<br>X |    |     |             |     |    |     |
| EVE-10 Batteries (Thomas-Antérion et al., 2006)                                                 | Public events : 38% correct<br><br>Famous people : 54% correct                                                                                                                                                                                  | X                | X  |     |             |     |    |     |
| Screening confabulation                                                                         | No provoqued confabulation                                                                                                                                                                                                                      |                  |    |     | X           |     |    |     |
| Modified Camel and Cactus test                                                                  | 32/32                                                                                                                                                                                                                                           |                  |    |     | X           |     |    |     |

220 **Table S19.**221 **Neuropsychological tests performed in amnesia patient.**

222 **Summary of the main tests performed three months prior to Experiment 4. VIN = very inferior to**  
 223 **the norm, IN = inferior to the norm, N = norm, SIN = Slightly inferior to the norm, SSN = Slightly**  
 224 **superior to the norm, SN = superior to the norm, VSN = very superior to the norm. y.o. = years old.**

| Volumes                      | Total<br>(cm <sup>3</sup> /%)            | Right<br>(cm <sup>3</sup> /%)            | Left (cm <sup>3</sup> /%)                | Assymetry<br>(%)<br>Right - Left    |
|------------------------------|------------------------------------------|------------------------------------------|------------------------------------------|-------------------------------------|
| <b>Hippocampus</b>           | <b>2.46 / (0.1944)</b><br>[ 0.28 - 0.43] | <b>1.12 / (0.0883)</b><br>[ 0.14 - 0.22] | <b>1.34 / (0.1061)</b><br>[ 0.14 - 0.22] | <b>-18.2331</b><br>[-16.78 - 10.90] |
| <b>CA1</b>                   | <b>0.93 / (0.0738)</b><br>[ 0.10 - 0.15] | <b>0.44 / (0.0349)</b><br>[ 0.05 - 0.08] | <b>0.49 / (0.0389)</b><br>[ 0.05 - 0.08] | <b>-11.0065</b><br>[-21.32 - 15.49] |
| <b>CA2-CA3</b>               | <b>0.16 (0.0128)</b><br>[ 0.02 - 0.03]   | <b>0.08 / (0.0062)</b><br>[ 0.01 - 0.02] | <b>0.08 / (0.0066)</b><br>[ 0.01 - 0.02] | <b>-5.5468</b><br>[-66.14 - 27.57]  |
| <b>CA4-DG</b>                | <b>0.55 / (0.0434)</b><br>[ 0.07 - 0.11] | <b>0.24 / (0.0189)</b><br>[ 0.03 - 0.06] | <b>0.31 / (0.0245)</b><br>[ 0.03 - 0.06] | <b>-26.0628</b><br>[-66.14 - 27.57] |
| <b>SR-SL-SM</b>              | <b>0.46 / (0.0360)</b><br>[ 0.03 - 0.04] | <b>0.20 / (0.0160)</b><br>[ 0.03 - 0.04] | <b>0.25 / (0.0200)</b><br>[ 0.03 - 0.04] | <b>-22.5932</b><br>[-24.20 - 23.20] |
| <b>Subiculum</b>             | <b>0.36 / (0.0285)</b><br>[ 0.03 - 0.05] | <b>0.16 / (0.0124)</b><br>[ 0.02 - 0.03] | <b>0.20 / (0.0160)</b><br>[ 0.02 - 0.03] | <b>-25.2172</b><br>[-16.68 - 29.38] |
| <b>Amygdala</b>              | <b>1.68 / (0.135)</b><br>[0.117, 0.172]  | <b>0.89 / (0.072)</b><br>[0.059, 0.086]  | <b>0.79 / (0.063)</b><br>[0.057, 0.087]  | <b>12.5550</b><br>[-11.868, 13.681] |
| <b>Entorhinal area</b>       | <b>3.80 / (0.305)</b><br>[0.226, 0.348]  | <b>2.06 / (0.165)</b><br>[0.113, 0.178]  | <b>1.74 / (0.140)</b><br>[0.105, 0.178]  | <b>16.8496</b><br>[-19.903, 25.976] |
| <b>Parahippocampal gyrus</b> | <b>5.12 / (0.411)</b><br>[0.332, 0.500]  | <b>2.44 / (0.196)</b><br>[0.157, 0.248]  | <b>2.69 / (0.216)</b><br>[0.170, 0.261]  | <b>-9.7990</b><br>[-24.494, 10.192] |

226 **Table S20.**

227 **Volumetry analysis of the inflamed regions from the diagnosis date eight months after the**  
228 **infection.** Eight months after the infection, the patient had significantly smaller bilateral  
229 hippocampi volume but spared amygdala, entorhinal cortex and parahippocampal gyrus as  
230 compared with 600 healthy participants using the volbrain software. For each region, the software  
231 provide the absolute volume in cubic centimeters (cm<sup>3</sup>) and in percent, computed as the ratio  
232 between the region's volume and the intracranial volume (considered as 100%). Number in  
233 brackets correspond to the normative value of neurologically intact population provided by the  
234 software. CA = cornu ammoni, DG = dentate gyrus, SR = stratum radiatum, SL = stratum  
235 lacunosum, SM = stratum moleculare.  
236

| Statement                                                                                                                                                                                                                    | Scale                                                                                                                                                                                                                                                         | Reference |
|------------------------------------------------------------------------------------------------------------------------------------------------------------------------------------------------------------------------------|---------------------------------------------------------------------------------------------------------------------------------------------------------------------------------------------------------------------------------------------------------------|-----------|
| My memory for this event involves sound                                                                                                                                                                                      | 1-7 little/A lot                                                                                                                                                                                                                                              | MCQ       |
| My memory for this event involves smell                                                                                                                                                                                      | 1-7 little/A lot                                                                                                                                                                                                                                              | MCQ       |
| My memory for this event involves touch                                                                                                                                                                                      | 1-7 little/A lot                                                                                                                                                                                                                                              | MCQ       |
| The overall tone of the memory is                                                                                                                                                                                            | Negative/Neutral/Positive                                                                                                                                                                                                                                     | MCQ       |
| In this event I was                                                                                                                                                                                                          | An observer /A participant                                                                                                                                                                                                                                    | MCQ       |
| I remember the event through my own eyes as during the event                                                                                                                                                                 | 1-7 Not at all/Definitely                                                                                                                                                                                                                                     | MCQ       |
| When you picture this event do you visualize it as a continuous video that plays with break, moving video clips with some breaks, one moving image or is it more like a set of snapshot with no movement, or something else? | 1-7<br>One smooth video/video clips with breaks/one moving image/snapshot in sequence/one static snapshot/Hazy image/no image<br>no image / Hazy image/one static snapshot /snapshot in sequence /one moving image /video clips with breaks /One smooth video | EAMI      |
| How often would you estimate you have thought about this memory since it first occurred?                                                                                                                                     | 1- 4<br>Frequently/Occasionally/Rarely/Never<br>Never/Rarely/Occasionally/Frequently                                                                                                                                                                          | EAMI      |
| How often would you estimate you have spoken about this memory since it first occurred?                                                                                                                                      | 1-4<br>Frequently/Occasionally/Rarely/Never<br>Never/Rarely/Occasionally/Frequently                                                                                                                                                                           | EAMI      |
| When you recall this event are you viewing the scene through your « own eyes » or can you see yourself in the memory from a third-person perspective?                                                                        | Own eyes/Mixture/Third person/something different/no imagery                                                                                                                                                                                                  | EAMI      |
| When you recall this event how would you describe it in terms of vividness? This can apply to the richness of sights, sounds, smells, tastes, touch, and any movements you may have made.                                    | 1-7 very vivid/very vague<br>1-7 very vague/very vivid                                                                                                                                                                                                        | EAMI      |
| The relative spatial arrangement of people in my memory for the event is                                                                                                                                                     | 1-7 Vague/Distinct                                                                                                                                                                                                                                            | MCQ       |
| My memory for the time when the event takes place is                                                                                                                                                                         | 1-7 Vague/Distinct                                                                                                                                                                                                                                            | MCQ       |
| When I remember the event, I see myself entirely in the scene as if I was watching a movie                                                                                                                                   | 1-7 Not at all/Definitely                                                                                                                                                                                                                                     | MCQ       |
| When I think about or tell this memory, I feel like I relive it as it happened                                                                                                                                               | 1-7 Not at all/Definitely                                                                                                                                                                                                                                     | MCQ       |
| I remember the movements and gestures I made with my body at the time of the event                                                                                                                                           | 1-7 / Vague/Distinct                                                                                                                                                                                                                                          | In-house  |
| My memory for this event is                                                                                                                                                                                                  | 1-7 Dim/Clear                                                                                                                                                                                                                                                 | MCQ       |
| My memory for this event involves visual details                                                                                                                                                                             | 1-7 Little/ A lot                                                                                                                                                                                                                                             | MCQ       |
| My memory for this event is                                                                                                                                                                                                  | 1-7 Sketchy/very detailed                                                                                                                                                                                                                                     | MCQ       |
| My memory for the location where the event takes place is                                                                                                                                                                    | 1-7 Vague/Distinct                                                                                                                                                                                                                                            | MCQ       |
| Relative spatial arrangement of objects in my memory for the event is                                                                                                                                                        | 1-7 Vague/Distinct                                                                                                                                                                                                                                            | MCQ       |
| When you think about this event now, do you re-experience any of the emotion you originally felt at the time? To what extent are you re-experiencing this emotion as a percentage?                                           | 0/25/50/75/100%                                                                                                                                                                                                                                               | EAMI      |
| To what extent are you re-experiencing this memory as a percentage?                                                                                                                                                          | 0/25/50/75/100%                                                                                                                                                                                                                                               | EAMI      |
| Would you say you are reliving this memory or looking back on it?                                                                                                                                                            | Reliving/Looking back                                                                                                                                                                                                                                         | EAMI      |

|                                                             |                           |     |
|-------------------------------------------------------------|---------------------------|-----|
| I remember how I felt at the time when the event took place | 1-7 Not at all/Definitely | MCQ |
| I remember what I thought at the time                       | 1-7 Not at all/Definitely | MCQ |

237 Table S21.

238 **Autoegetic consciousness questionnaire.** Scale from original questionnaire is indicated in  
 239 black, new scale is indicated in green.

240

241 **Movie S1.**

242 [Supplementary Video 1](#)

243 Experimental design: (Upper panel) 3D scene with the embedded avatar, as observed by a  
244 participant performing the virtual reality task. (Lower panel) Movements performed by a  
245 participant inside the MR scanner. Due to physical constraint (MR scanner magnetic field), this  
246 was filmed in a replicate of an MR scanner, similar to the one used for Experiment 1 and 3.

247

248

249



250 **Supplementary Note 1**

251

252 Results

253 ***Intentional encoding. Higher SoA and better recognition performance for intentional***  
254 ***encoding when immersed with visuomotor and perspectival congruency (behavior, Experiment***  
255 ***3)***

256 Although there was no significant difference for SoA ratings when comparing the conditions  
257 SYNCH1PP and ASYNCH1PP in Experiment 3, we note that the results in this experiment are  
258 going in the same direction as those from Experiments 1 and 2 (i.e., higher SoA in SYNCH1PP  
259 than in ASYNCH1PP and ASYNCH3PP). We compared the effect size from Experiments 1 and  
260 2 with the effect size of Experiment 3 regarding the difference between SYNCH1PP and  
261 ASYNCH1PP. In Experiments 1 and 2, the difference between SYNCH1PP and ASYNCH1PP  
262 was comprised within a confidence interval between -0.43 and -0.08, while the standard coefficient  
263 is of -0.26. In Experiment 3, the confidence interval is comprised between -0.45 and 0.11, and the  
264 standard coefficient is of -0.17. Accordingly, the difference is not significant. However, when we  
265 performed additional analysis pulling the three experiments together, the SoA was consistently  
266 higher in the SYNCH1PP compared to the two other conditions, independent of Experiment  
267 (SYNCH1PP compared to ASYNCH1PP: estimate = -0.059,  $t = -3$ ,  $p = 0.003$ ; SYNCH1PP  
268 compared to ASYNCH3PP: estimate = -0.08,  $t = -4.28$ ,  $p < 0.001$ ), with a confidence interval  
269 between -0.38 to -0.08, and a standard coefficient of -0.23, which is similar to what is obtained  
270 when applying the model on Experiments 1 and 2 only.

271 **Supplementary Note 2**

272

273 ***ERS analysis. Reinstatement in the left hippocampus is higher for visuomotor and perspectival***  
274 ***congruency and indexes recognition memory.***

275 *Model selection to explain recognition performance with hippocampal ERS*

276 To better understand the link between hippocampal ERS and memory, we compared a model  
277 which explains recognition performance using hippocampal ERS and conditions (Model 1) with a  
278 model considering only hippocampal ERS irrespective of conditions (Model 0). We found that  
279 both models were equally good (i.e. had the same AIC;  $m1$  AIC = -159.83,  $m0$  AIC = -159.73,  
280  $X_2 = 8.10$ ,  $p = 0.088$ , Table S13). Therefore we used the model with the smaller number of  
281 parameters (Model 0) for further analysis.

282 **Supplementary Note 3**

283 ***ERS analysis. Reinstatement in the left hippocampus is higher for visuomotor and perspectival***  
284 ***congruency and indexes recognition memory.***

285 *Hippocampal ERS and performance, Trial-by-Trial*

286 The positive correlation between left hippocampal ERS and recognition performance was found  
287 for average hippocampal ERS (per session average of successful and failed trials) and for the  
288 overall recognition performance (percent of correct answers). To investigate whether this relation  
289 holds for single trials, we applied a logistic mixed effect model to investigate trial-by-trial  
290 recognition performance with trial-by-trial hippocampal ERS (as described in the main text). This  
291 analysis revealed a significant triple interaction between condition, stimulus (same scene than the  
292 one at encoding versus changed scene), and left hippocampal ERS, when SYNCH1PP was  
293 compared to ASYNCH3PP (estimate = -2.04,  $z = -2.6$ ,  $p = 0.009$ , Table S13). *Post-hoc* analysis  
294 revealed that the significant effect was driven by the significantly positive relationship between  
295 recognition performance and left hippocampal ERS in SYNCH1PP (Fig. 4B, Table S13), but only  
296 when the stimulus presented was the same scene as the one observed at encoding (estimate = 1.7,  
297  $z = 3.5$ ,  $p < 0.001$ ). The relation between hippocampal ERS and recognition performance was not  
298 significant for the ASYNCH3PP conditions (Table S13). This shows that only the main  
299 experimental condition with visuomotor and perspectival congruency, associated activity in left  
300 hippocampus with recognition performance on a trial by trial basis.

#### 301 **Supplementary Note 4**

302

#### 303 *Hippocampal-neocortical interactions revealed by ERS are modulated by visuomotor and* 304 *perspectival congruency*

305

306 We found that participant's SoA was correlated with the activity of the BSC regions at encoding  
307 (Premotor left:  $r = 0.22$ ,  $df = 79$ ,  $t = 1.98$ ,  $p = 0.05$ , right SMA:  $r = 0.35$ ,  $df = 79$ ,  $t = 3.38$ ,  $p =$   
308  $0.001$ , left SMA:  $r = 0.3$ ,  $df = 79$ ,  $t = 2.81$ ,  $p = 0.006$ ), suggesting that these regions identified using  
309 the contrast (SYNCH1PP > ASYNCH1PP + ASYNCH3PP) are involved in the subjective outcome  
310 of the BSC manipulation (SoA).

#### 311 **Supplementary Note 5**

312

#### 313 *Amnesic patient with bilateral hippocampal damage is impaired in recognizing objects encoded* 314 *with visuomotor and perspectival congruency*

315

316 We tested the patient five months after her hospitalization. At that time, the patient's scored 25 at  
317 the Montreal Cognitive Assessment test, with 100% correct answer on the memory part of the test  
318 although she still suffered from autobiographical memory deficit.

319 The difference in the patient's SoA ratings between the SYNCH1PP condition and both  
320 ASYNCH1PP and ASYNCH3PP was modulated in the same way as observed in the healthy  
321 participants and her sensitivity to the manipulation was even higher compared to healthy  
322 participants as tested using Crawford test, due to larger SoA differences across conditions

323 (SYNCH1PP compared to ASYNCH1PP: mean = 0.05, sd ± = 0.16, p <0.001; ASYNCH1PP  
324 compared to ASYNCH3PP: mean = 0.03, sd ± = 0.16, p = 0.004). The SoA difference between  
325 SYNCH1PP and ASYNCH3PP was not significantly different compared to healthy participants  
326 but going in the same direction (SYNCH1PP-ASYNCH3PP: mean = 0.08, sd ± = 0.18, p = 0.134).  
327 Similar findings were obtained for ownership ratings (SYNCH1PP-ASYNCH1PP: mean = 4.00e-  
328 03, sd ± = 0.21, p = 0.002). The other difference between conditions were in the same range than  
329 the healthy participants rating (SYNCH1PP-ASYNCH3PP: mean = 0.12, sd ± = 0.23, p < .001;  
330 ASYNCH1PP-ASYNCH3PP: mean = 0.12, sd ± = 0.21, p = 0.314). The patient's ratings for  
331 control items were low, did not differ between conditions, and also did not differ from those of  
332 healthy participants (SYNCH1PP-ASYNCH1PP: mean = -0.008, sd ± = 0.09, p = 0.257;  
333 SYNCH1PP-ASYNCH3PP: mean = 0.02, sd ± = 0.07, p = 0.295; ASYNCH1PP-ASYNCH3PP:  
334 mean = 0.03, sd ± = 0.11, p = 0.438).  
335

## 336 **Supplementary Note 6**

337 Methods

338

339 *VR scenes*

340

341 Each scene contained the following objects: Living room: mug, tennis ball, gloves, soccer ball,  
342 slippers, coat, forks, umbrella, toy-train, radio, phone, carpet, pillow, bottle, fan, bucket, soap, golf  
343 swing; Changing room: dice, knife, shoes, bike, teapot, basketball, apron, alarm clock, plant,  
344 glasses, sledge, camera, vase, chair, Ping-Pong racket, guitar, diving mask, beanbag; Cabin: pen,  
345 ice skate shoes, broom, tie, book, skis, tennis racket, belt, water can, pants, remote controller, skate,  
346 treadmill, microwave, cane, computer, calculator, helmet; BSC scene (forest): hammer, pocket  
347 clock, sponge, box gloves, snowboard, flipflop, scooter, socks, bowling ball, bowtie, baseball bat,  
348 vacuum cleaner, paddle, cane, coffee maker, dumbbell, smoking pipe, phonograph.

349

350
