# Supplementary material for: Embodiment in episodic memory through premotor-hippocampal coupling
Source: PubMed Central journal article supplement — Commun Biol. 2024 Sep 10;7:1111. doi: 10.1038/s42003-024-06757-7 (PMC11387647; doi:10.1038/s42003-024-06757-7), 2024-09-10
Supplement: 42003_2024_6757_MOESM3_ESM.pdf [file 42003_2024_6757_MOESM3_ESM.pdf]

## Description Of Additional Supplementary Data

**File Name:** Supplementary Video.

**Description:** Experimental design: (Upper panel) 3D scene with the embedded avatar, as observed by a participant performing the virtual reality task. (Lower panel) Movements performed by a participant inside the MR scanner. Due to physical constraint (MR scanner magnetic field), this was filmed in a replicate of an MR scanner, like the one used for Experiment 1 and 3.
